# Supplementary material for: An etch-doping strategy: cobalt–iron bimetallic phosphide as a bifunctional electrocatalyst for highly efficient water splitting
Source: Royal Society of Chemistry journal article supplement (doi:10.1039/d0nj06313d), 2021-01-01
Supplement: d0nj06313d1.pdf [file d0nj06313d1.pdf]

## Electronic Supplementary Information

### Etch-Doping Strategy: Cobalt-Iron Bimetallic Phosphide as a Bifunction Electrocatalyst for Highly Efficient Water Splitting

Yuanyuan Wang, Shanshan Wang, Xiaogang Chen, Xuan Zhao, Shulong Chang,  
Fengmei Guo, Jie Xu, Yuanyuan Shang and Yingjiu Zhang\*

Key Laboratory of Material Physics, Ministry of Education, School of Physics and  
Microelectronics, Zhengzhou University, Zhengzhou 450052, PR China

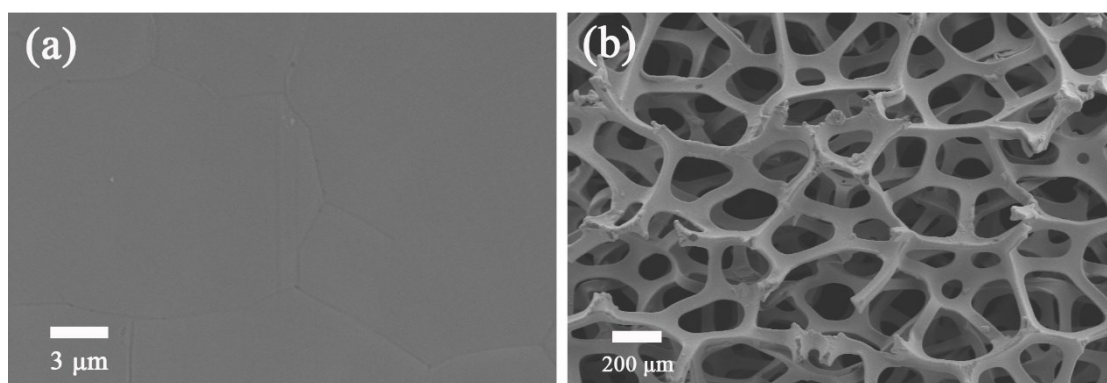

Fig. S1 (a) High and (b) low resolution SEM images of bare NF.

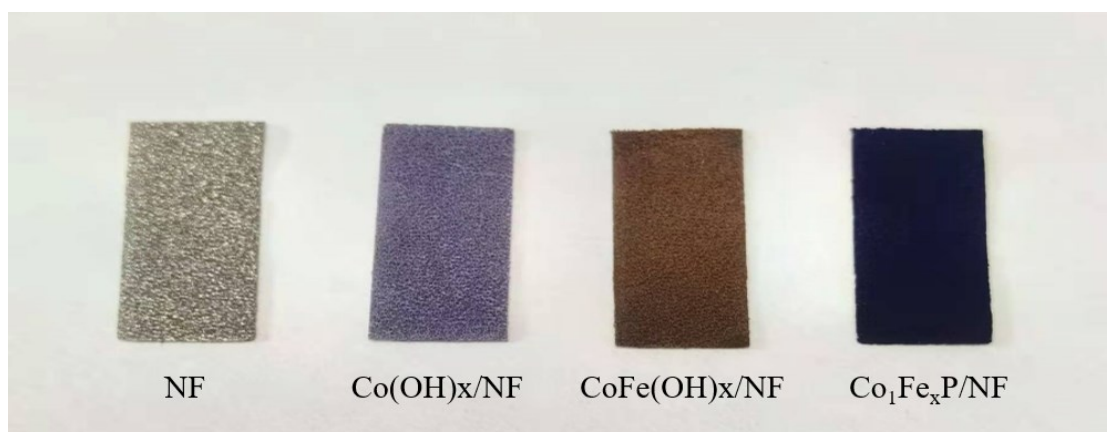

Fig. S2 Physical map of each product during the experiment

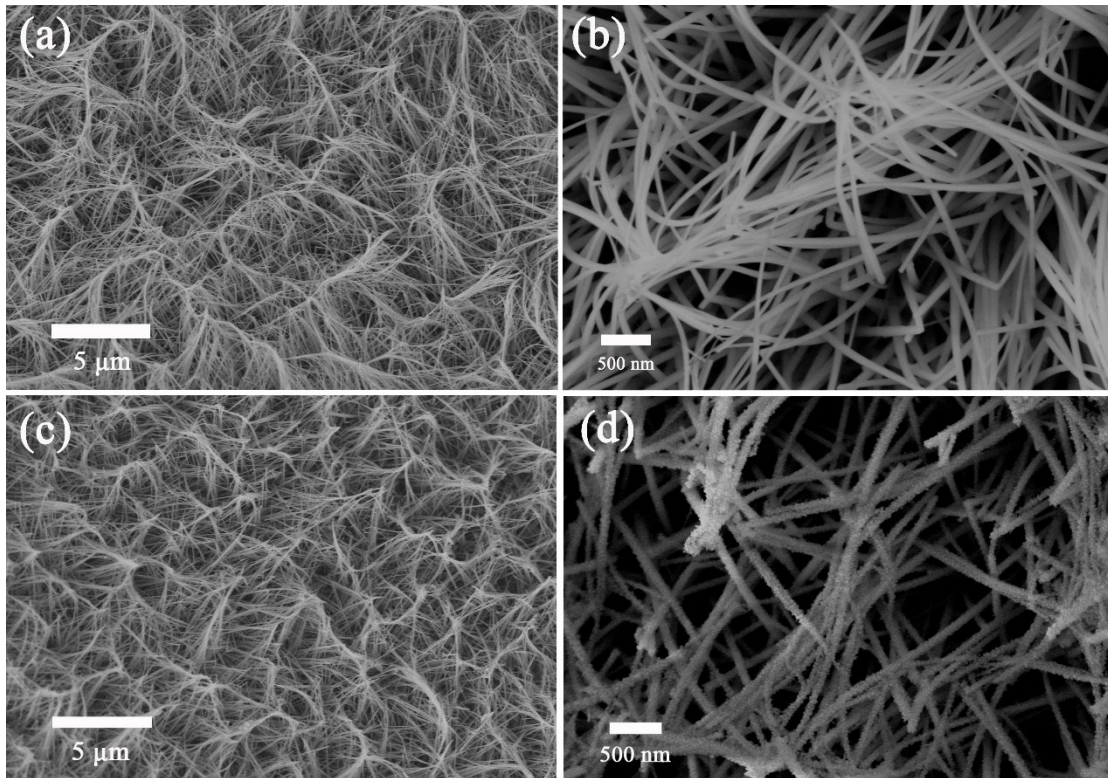

Fig. S3 (a) Low and (b) high resolution SEM images of  $\text{Co(OH)}_x/\text{NF}$ . (a) Low and (b) high resolution SEM images of  $\text{CoFe(OH)}_x/\text{NF}$ .

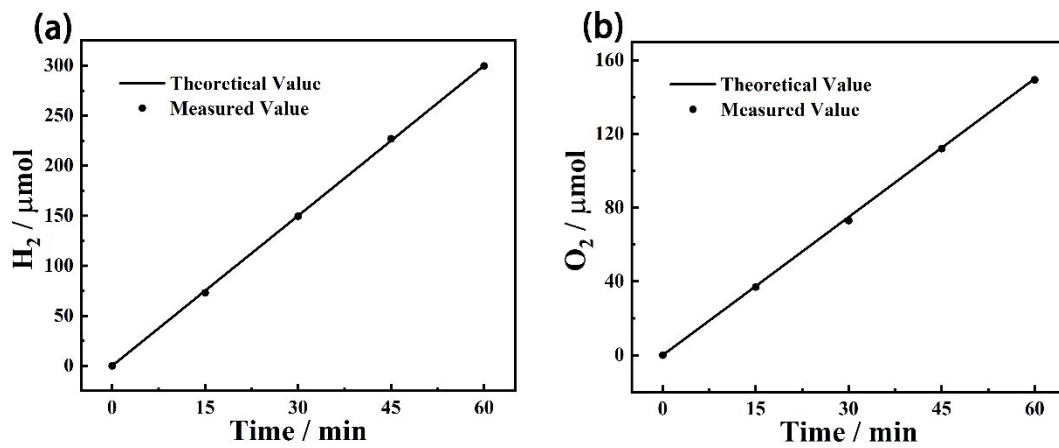

Fig. S4 (a) Electrocatalytic efficiency of  $\text{H}_2$  production over  $\text{Co}_1\text{Fe}_{0.1}\text{P}/\text{NF}$  at a current density of  $20 \text{ mA cm}^{-2}$ . (b) Electrocatalytic efficiency of  $\text{O}_2$  production over  $\text{Co}_1\text{Fe}_{0.1}\text{P}/\text{NF}$  at a current density of  $20 \text{ mA cm}^{-2}$ .

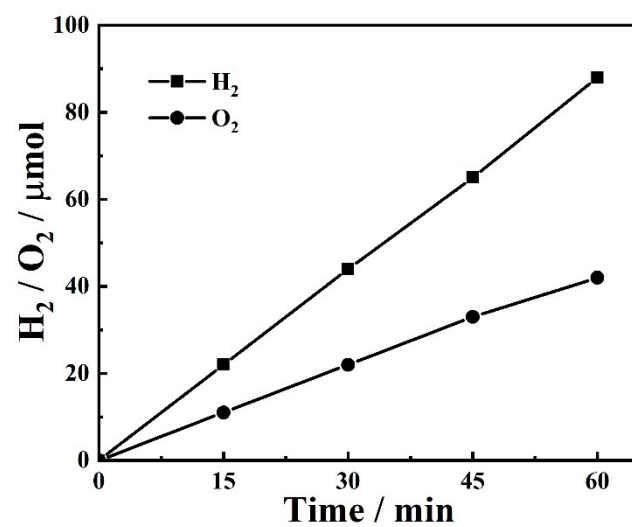

Fig. S5 H<sub>2</sub> and O<sub>2</sub> production over Co<sub>1</sub>Fe<sub>0.1</sub>P/NF at a current density of 20 mA cm<sup>-2</sup>.

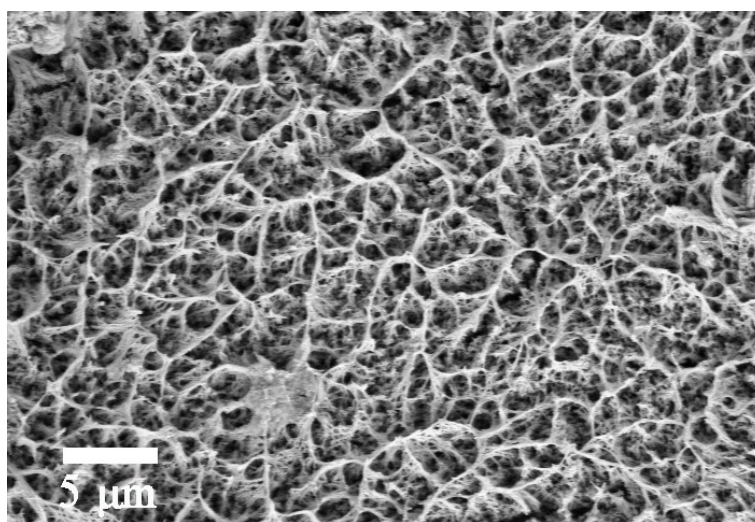

Fig. S6 SEM images of Co<sub>1</sub>Fe<sub>0.1</sub>P/NF catalyst after 24 h OER test.



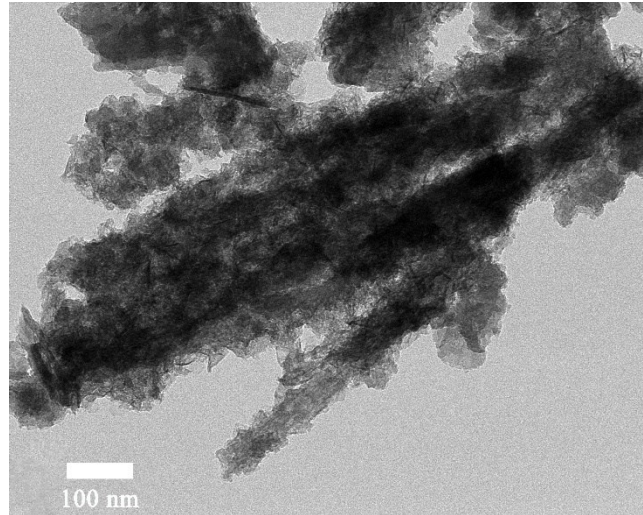

Fig. S7 TEM images of  $\text{Co}_1\text{Fe}_{0.1}\text{P/NF}$  catalyst after 24 h OER test.

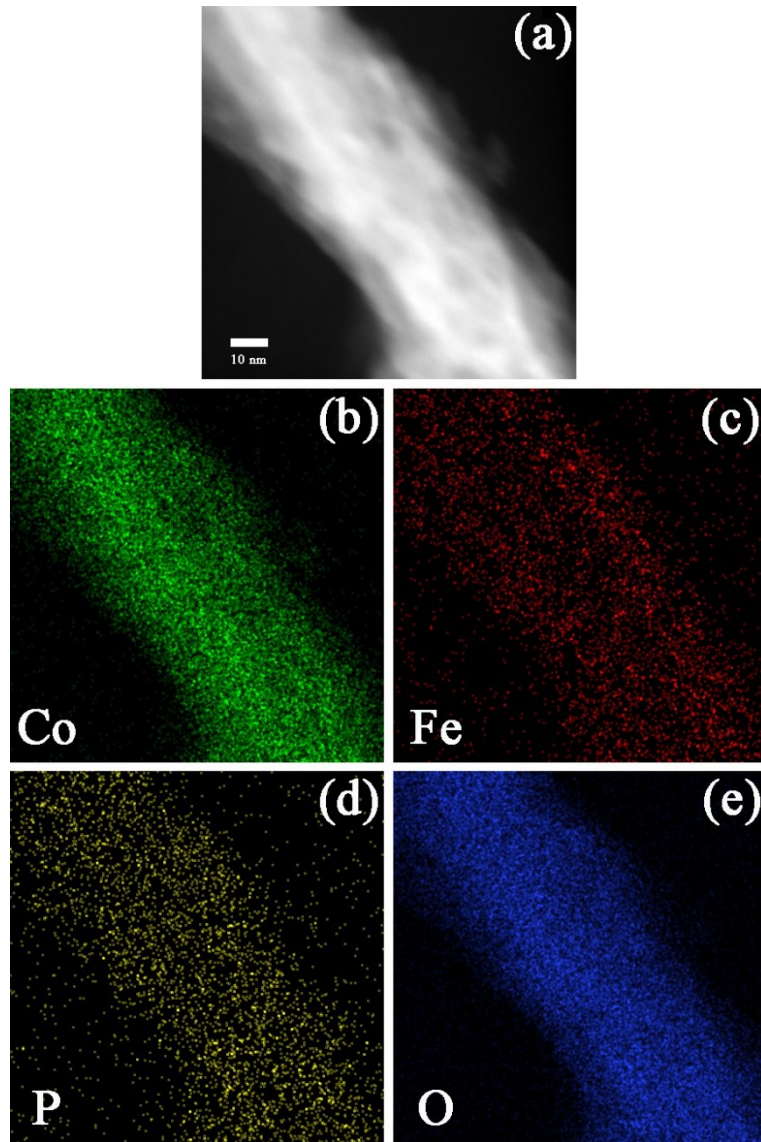

Fig. S8 Mapping images of  $\text{Co}_1\text{Fe}_{0.1}\text{P/NF}$  catalyst after 24 h OER test.

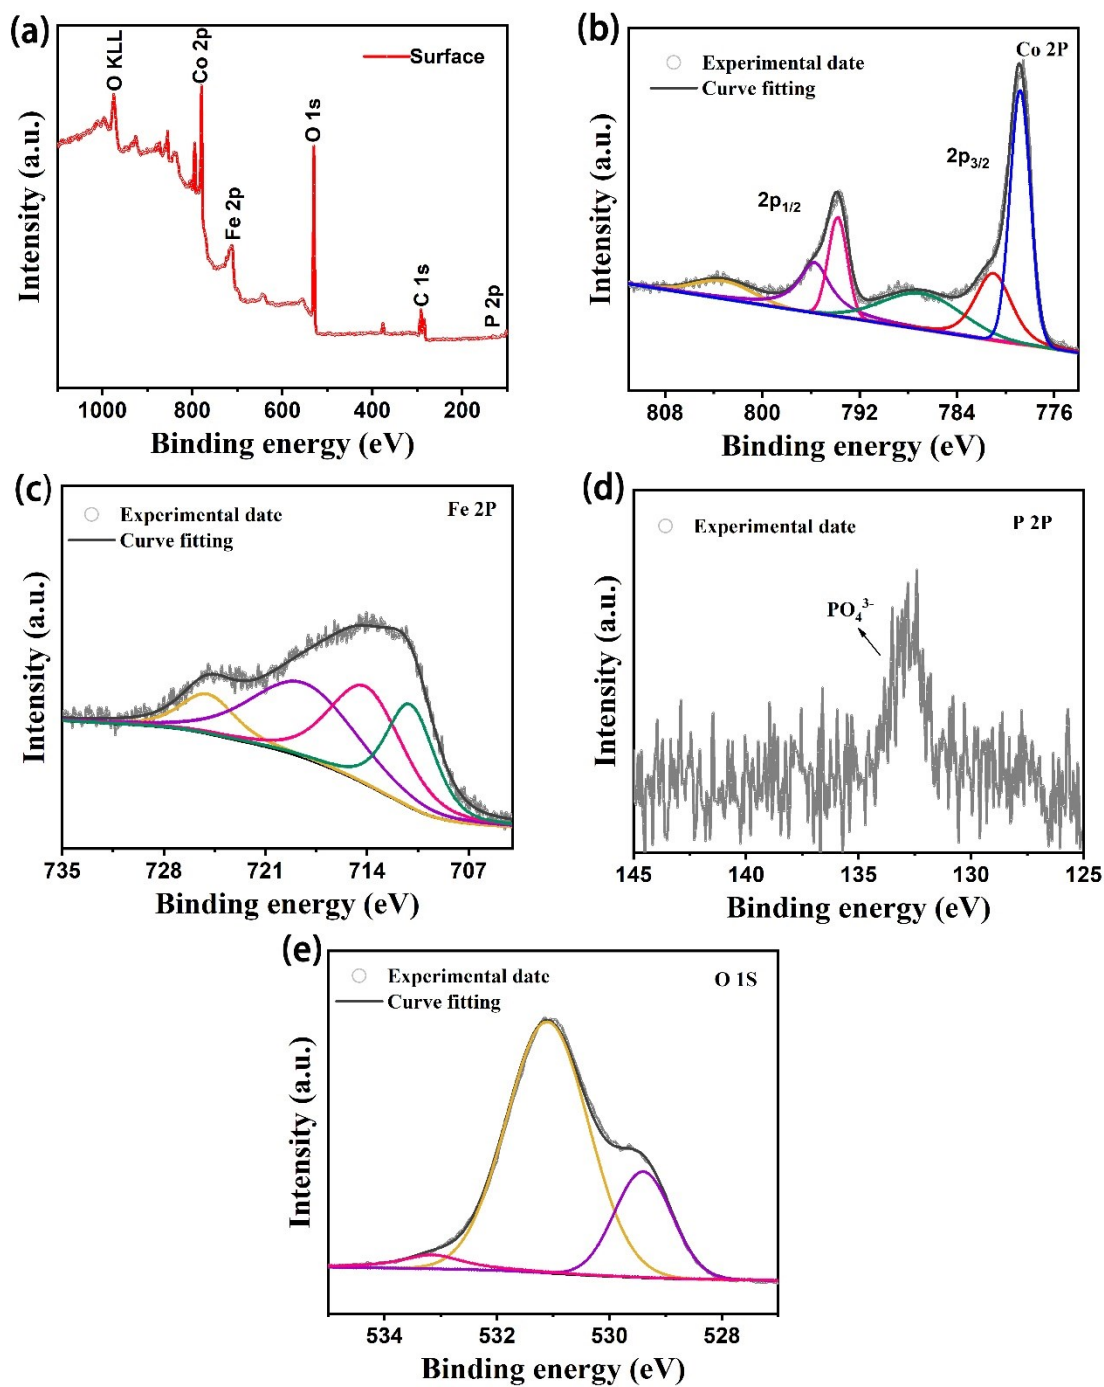

Fig. S9 (a) XPS survey spectrum of Co<sub>1</sub>Fe<sub>0.1</sub>P/NF nanowires after 24 h OER test; The XPS spectra of (b) Co 2p, (c) Fe 2p, and (d) P 2p in the Co<sub>1</sub>Fe<sub>0.1</sub>P/NF.

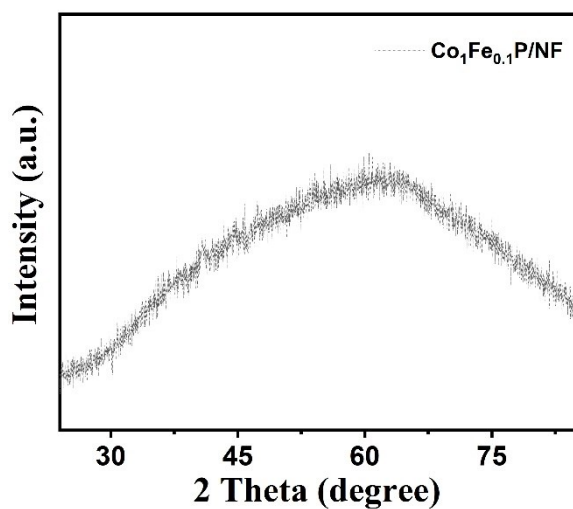

Fig. S10 XRD patterns of  $\text{Co}_1\text{Fe}_{0.1}\text{P/NF}$  after 24 h OER test.

Table S1 Related parameters of nickel foam.

|    | thickness | Specific surface area      | Porosity |
|----|-----------|----------------------------|----------|
| NF | 1.0 mm    | $320 \text{ g/m}^2 \pm 20$ | 95%-98%  |

Table S2 Load capacity of different batches of the same sample.

|                                         | Quality (mg)     | average value (mg) |
|-----------------------------------------|------------------|--------------------|
| NF                                      | 95.1/89.7/90.7   | 91.83              |
| $\text{Co}_1\text{Fe}_{0.1}\text{P/NF}$ | 105.2/100.0/99.0 | 100.14             |
| Sample load                             | 10.1/10.3/8.3    | 9.57               |

Table S3 Inductively coupled plasma of 1M KOH after OER test.

| Metal ions     | P    |
|----------------|------|
| Content (mg/L) | 0.70 |

Table S4 Summary of TMP-based electrocatalysts for HER, OER and overall water splitting in 1 M KOH.

| Catalyst                                            | Electrolyte | Overpotential @J <sub>10</sub> /mV for HER | Overpotential @ J <sub>10</sub> /mV for OER | Overpotential @J <sub>10</sub> /V for overall water splitting | Reference |
|-----------------------------------------------------|-------------|--------------------------------------------|---------------------------------------------|---------------------------------------------------------------|-----------|
| CoFeP@Ru                                            | 1M KOH      | 94                                         | 270                                         | 1.60                                                          | [1]       |
| Ni <sub>2</sub> P/Cu <sub>3</sub> P                 | 1M KOH      | 88                                         | 262                                         | 1.60                                                          | [2]       |
| A-NiSe <sub>2</sub> P                               | 1M KOH      | 111                                        | 272                                         | 1.62                                                          | [3]       |
| P-Fe <sub>3</sub> N@NC                              | 1M KOH      | 102                                        | 270                                         | 1.61                                                          | [4]       |
| MnCo <sub>2</sub> O <sub>4</sub> @Ni <sub>2</sub> P | 1M KOH      | 57                                         | 240                                         | 1.63                                                          | [5]       |
| Ni <sub>2</sub> P@rGO                               | 1M KOH      | 142                                        | 260                                         | 1.61                                                          | [6]       |
| CoP@3D Ti <sub>3</sub> C <sub>2</sub> -MXene        | 1M KOH      | 168                                        | 280                                         | 1.58                                                          | [7]       |
| Co <sub>0.6</sub> Fe <sub>0.4</sub> P NPs           | 1M KOH      | 133                                        | 298                                         | 1.57                                                          | [8]       |
| CoS <sub>0.46</sub> P <sub>0.54</sub>               | 1M KOH      | 101                                        | 302                                         | 1.62                                                          | [9]       |
| Co <sub>1</sub> Fe <sub>0.1</sub> P/NF              | 1M KOH      | 73                                         | 257                                         | 1.60                                                          | This work |
